# Supplementary material for: Educational differences in psychological distress? Results from a population-based sample of men and women in Sweden in 2012
Source: PubMed Central journal article supplement — BMJ Open. 2018 Apr 28;8(4):e021007. doi: 10.1136/bmjopen-2017-021007 (PMC5931303; doi:10.1136/bmjopen-2017-021007), 2018-04-28
Supplement: bmjopen-2017-021007.draft_revisions.pdf [file bmjopen-2017-021007.draft_revisions.pdf]

# BMJ Open

BMJ Open is committed to open peer review. As part of this commitment we make the peer review history of every article we publish publicly available.

When an article is published we post the peer reviewers' comments and the authors' responses online. We also post the versions of the paper that were used during peer review. These are the versions that the peer review comments apply to.

The versions of the paper that follow are the versions that were submitted during the peer review process. They are not the versions of record or the final published versions. They should not be cited or distributed as the published version of this manuscript.

BMJ Open is an open access journal and the full, final, typeset and author-corrected version of record of the manuscript is available on our site with no access controls, subscription charges or pay-per-view fees (<http://bmjopen.bmj.com>).

If you have any questions on BMJ Open's open peer review process please email [info.bmjopen@bmj.com](mailto:info.bmjopen@bmj.com)

# BMJ Open

## Educational differences in psychological distress? Results from a population-based sample of men and women in Sweden in 2012

|                               |                                                                                                                                                                                                                       |
|-------------------------------|-----------------------------------------------------------------------------------------------------------------------------------------------------------------------------------------------------------------------|
| Journal:                      | <i>BMJ Open</i>                                                                                                                                                                                                       |
| Manuscript ID                 | bmjopen-2017-021007                                                                                                                                                                                                   |
| Article Type:                 | Research                                                                                                                                                                                                              |
| Date Submitted by the Author: | 07-Dec-2017                                                                                                                                                                                                           |
| Complete List of Authors:     | Molarius, Anu; Region Vastmanland, Competence Centre for Health; Karlstads Universitet, Department of Public Health Sciences<br>Granström, Fredrik; Linkopings universitet, Department of Medical and Health Sciences |
| Keywords:                     | MENTAL HEALTH, PUBLIC HEALTH, EPIDEMIOLOGY, SOCIAL MEDICINE                                                                                                                                                           |
|                               |                                                                                                                                                                                                                       |

SCHOLARONE™  
Manuscripts

view only

1  
2  
3  
4  
5  
6  
7  
8  
9  
10  
11 **Educational differences in psychological distress? Results from a population-**  
12 **based sample of men and women in Sweden in 2012**  
13  
14  
15

16  
17  
18 Anu Molarius<sup>1,2</sup>, Fredrik Granström<sup>3</sup>  
19  
20

21  
22 <sup>1</sup>Competence Centre for Health, Region Västmanland, Västerås, Sweden  
23

24 <sup>2</sup>Department of Public Health Sciences, Karlstad University, Karlstad, Sweden  
25

26 <sup>3</sup>Division of Community Medicine, Department of Medical and Health Sciences, Linköping University,  
27  
28 Linköping, Sweden  
29  
30

31  
32  
33  
34  
35  
36  
37  
38  
39  
40 Correspondence: Anu Molarius, Competence Centre for Health, Region Västmanland, 721 89  
41

42 Västerås, Sweden, tel: +46 21 174583, e-mail: anu.molarius@regionvastmanland.se  
43  
44  
45  
46  
47  
48  
49  
50

51 Word count: 1565  
52

53 Keywords: Health inequalities, Psychological distress, Population surveys, Sweden  
54  
55  
56  
57  
58  
59  
60

**Abstract**

*Background:* Mental health problems are more frequent in socially disadvantaged groups, but the results vary between different studies, different populations and different measures of mental health. This paper investigated the association between educational level and psychological distress in Sweden.

*Methods:* The study population included 24,510 respondents aged 25-74 years who responded a survey questionnaire in Mid-Sweden in 2012 (response rate 53%). Psychological distress was measured with GHQ-12 and multivariate logistic regression models were used in statistical analyses, adjusting for age and economic difficulties.

*Results:* The prevalence of psychological distress was higher in women (16.4%) than in men (11.3%;  $p < 0.001$ ). The odds ratio between high and low educational levels was not statistically significant. Persons with medium educational level had a lower risk of psychological distress than persons with high educational level. Economic difficulties had a strong association with psychological distress, but the association between educational level and psychological distress remained unchanged after adjustment.

*Conclusion:* Even though there was a strong association between economic difficulties and psychological distress in this study, no inverse association between educational level and psychological distress was found. No indications are therefore found that differences in mental health problems would explain educational inequalities in general health in Sweden.

**Strengths and limitations of this study**

- The study is based on a considerable, representative sample of the general population in a large geographic area and covers a wide age group of men and women from 25 to 74 years.
- Internationally validated questionnaire (GHQ-12) was used to measure psychological distress and register data to measure educational level.
- As people with poor health and/or low education often have higher non-response rates, the response-rate of 53% may have led to underestimation of educational differences in mental health.
- The study is based on cross-sectional data which prevents any causal interpretations of the results.

## Introduction

Social inequalities in health are well documented and have been found for several health outcomes such as mental health problems (1-3), self-rated health (4-5) and mortality (6). The most often used measures of socio-economic status include education, income and occupation. For mental health problems, there is strong evidence that low socioeconomic position is associated with severe mental health disorders such as major depression (7). Previous studies have also shown that less severe, so-called common mental disorders are significantly more frequent in socially disadvantaged groups, such as the unemployed and persons with low education, low income and poor material standard of living (1). Even though low education is consistently associated with common mental disorders (1) some previous studies have shown stronger associations with income or financial difficulties or strain than with educational level (2, 8). In addition, differences in this association between men and women have been reported (3). The association may therefore differ between populations, genders and national or cultural context, and may also change over time.

Mental disorders are the leading cause of disability worldwide (9) and social inequalities in health are a major public health challenge. In Sweden, there are large educational differences in self-rated health. Persons with low educational level have approximately twice as often poor self-rated health as persons with high educational level (5, 10). Mental health problems may thus have a mediating role in the association between education and self-rated health. Therefore it is important to examine educational differences in mental health.

Socioeconomic differences in common mental disorders are often examined using validated and reliable measures of minor mental health problems such as the General Health Questionnaire (GHQ). GHQ measures psychological distress, including depressive symptoms, anxiety and affective well-being (11). The aim of this study was to investigate the association between educational level and

1  
2  
3 psychological distress among a population-based sample of men and women in Sweden in 2012.

4  
5 Also, the role of economic difficulties was investigated.  
6  
7  
8  
9

## 10 11 **Methods**

12  
13 The study is based on a survey questionnaire sent to a random population sample in four counties in  
14  
15 Mid-Sweden in 2012. The survey was carried out in collaboration with the Public Health Institute  
16  
17 (now the Public Health Agency of Sweden) and the four counties (Uppsala, Sörmland, Västmanland  
18  
19 and Örebro). The age range was 25-74 years and the study population included 24,510 respondents  
20  
21 (response rate 53%).  
22

23  
24  
25 Information on gender, age and educational level were based on register data from Statistics  
26  
27 Sweden. Levels of education were categorised into compulsory school or equivalent education for  
28  
29 nine years or less, secondary education (10–12 years of education), and post-secondary education  
30  
31 (more than 12 years of education). Current economic difficulties were assessed by asking whether  
32  
33 the respondent had had problems with current expenditure for food, rent, bills, etc. during the past  
34  
35 12 months (yes/no).  
36  
37

38  
39  
40 *Psychological distress* was measured by the 12-item version of the General Health Questionnaire  
41  
42 (GHQ-12) (11). The General Health Questionnaire is a widely used measure of minor psychiatric  
43  
44 morbidity, which primarily reflects general, non-psychotic and context-free mental health problems  
45  
46 in the recent past but is also predictive of more severe mental disorders (11). A recommended and  
47  
48 commonly used cut off point of three or more symptoms was used in this study to indicate  
49  
50 psychological distress (2, 11-12).  
51  
52  
53  
54  
55  
56  
57

1  
2  
3 The respondents gave their informed consent for applying the registry data by answering the  
4  
5 questionnaire. After the record linkage, all identity information were removed before the material  
6  
7 was handed over from Statistics Sweden to the county councils. Permission from the regional ethical  
8  
9 review board in Uppsala has been obtained (EPN 2012/256).  
10

### 11 12 13 *Statistical methods*

14  
15 Prevalence of psychological distress is reported by educational level and economic difficulties in men  
16  
17 and women. Differences between groups were tested using chi-squared statistics. Since the  
18  
19 prevalence of mental health symptoms is higher in younger age groups (8) multivariate logistic  
20  
21 regression models adjusting for age (in 10-year groups), and in a second model also for economic  
22  
23 difficulties, were carried out. The results are reported as odds ratios (OR) and 95 percent confidence  
24  
25 intervals (95% CI) for psychological distress. SPSS, version 24, was used for all analyses.  
26  
27  
28  
29  
30  
31

### 32 **Results**

33  
34 The prevalence of psychological distress was higher in women (16.4%) than in men (11.3%;  $p < 0.001$ ).  
35  
36 There were statistically significant but rather small differences between educational levels, with  
37  
38 somewhat higher levels of psychological distress at high educational level (table 1). There was,  
39  
40 however, a strong association between economic difficulties and psychological distress in both men  
41  
42 and women.  
43  
44  
45  
46  
47  
48  
49  
50  
51  
52  
53  
54  
55  
56  
57  
58  
59  
60



Table 1. Prevalence of and odds ratios for psychological distress by educational level and current economic difficulties (all models adjusted for age) in men and women aged 25-74 years in 2012.

| Variable              | N     | Psychological distress (%) | P-value for difference | Model 1 OR (95 % CI) | Model 2 OR (95 % CI) |
|-----------------------|-------|----------------------------|------------------------|----------------------|----------------------|
| <b>Total</b>          | 24510 | 14.1                       |                        |                      |                      |
| <b>Men</b>            | 11133 | 11.3                       | <0.001*                |                      |                      |
| Educational level     |       |                            | 0.003                  |                      |                      |
| Low                   | 2279  | 10.3                       |                        | 1.02 (0.86, 1.22)    | 0.90 (0.75, 1.08)    |
| Medium                | 5302  | 10.8                       |                        | 0.86 (0.76, 0.99)    | 0.80 (0.70, 0.92)    |
| High                  | 3552  | 12.8                       |                        | 1                    | 1                    |
| Economic difficulties |       |                            | <0.001                 |                      |                      |
| No                    | 9827  | 9.1                        |                        |                      | 1                    |
| Yes                   | 1283  | 29.0                       |                        |                      | 3.79 (3.28, 4.37)    |
| <b>Women</b>          | 13377 | 16.4                       |                        |                      |                      |
| Educational level     |       |                            | <0.001                 |                      |                      |
| Low                   | 2043  | 14.4                       |                        | 1.06 (0.91, 1.23)    | 0.93 (0.80, 1.08)    |
| Medium                | 5988  | 15.4                       |                        | 0.90 (0.82, 1.00)    | 0.83 (0.75, 0.92)    |
| High                  | 5346  | 18.2                       |                        | 1                    | 1                    |
| Economic difficulties |       |                            | <0.001                 |                      |                      |
| No                    | 11394 | 13.3                       |                        |                      | 1                    |

1  
2  
3  
4  
5  
6  
7  
8  
9  
10  
11  
12  
13  
14  
15  
16  
17  
18  
19  
20  
21  
22  
23  
24  
25  
26  
27  
28  
29  
30  
31  
32  
33  
34  
35  
36  
37  
38  
39  
40  
41  
42  
43  
44  
45  
46  
47

---

|     |      |      |                   |
|-----|------|------|-------------------|
| Yes | 1946 | 34.8 | 3.07 (2.75, 3.43) |
|-----|------|------|-------------------|

---

\* p-value for difference between men and women.

For peer review only

1  
2  
3  
4 In the age adjusted model, the odds ratio for psychological distress for the low educational level was  
5  
6 not statistically significant when compared to the high educational level. Persons with medium  
7  
8 educational level had a lower risk of psychological distress than persons with high educational level.  
9  
10 Further adjustment for economic difficulties showed that economic difficulties had a strong  
11  
12 association with psychological distress, but the association between educational level and  
13  
14 psychological distress remained practically unchanged. No statistically significant differences were  
15  
16 observed in the odds ratios for educational level and economic difficulties between men and women.  
17  
18  
19  
20  
21  
22

### 23 **Discussion**

24  
25 The findings of this study suggest that there is no inverse association between educational level and  
26  
27 psychological distress in this adult population in Sweden. A strong association between economic  
28  
29 difficulties and psychological distress was however found. The associations between educational  
30  
31 level, economic difficulties and psychological distress were rather similar in men and in women even  
32  
33 though the prevalence of psychological distress was higher among women.  
34  
35  
36  
37

38 The results are in line with a national Swedish study where economic hardship was strongly  
39  
40 associated with psychological distress (12). In that study, the independent effect of educational level  
41  
42 was however not studied. Several previous studies have shown educational differences in mental  
43  
44 health problems (1) but a weak association between educational level and common mental disorders  
45  
46 has been observed in a working population in Finland (2). No association between low education and  
47  
48 poor mental health has been reported from some studies in Sweden (7, 13) whereas a Danish study  
49  
50 showed a relationship between low education and high prevalence of both minor and major  
51  
52 depression (14). A strong association between low education and clinical depression has also been  
53  
54 reported among representative population-based studies conducted in Finland, Poland and Spain  
55  
56  
57  
58  
59  
60

1  
2  
3 (15). These findings suggest that low education may be more consistently related to severe mental  
4 health problems than to minor psychiatric morbidity.  
5  
6  
7

8  
9 The association between educational level and mental health was similar in men and women in our  
10 study. This is in line with several previous studies (2, 13) and does not confirm the gender differences  
11 found, for example, in Canada (3).  
12  
13  
14

15  
16  
17 The current study has some limitations. The response rate was 53%. As people with poor health  
18 and/or low education often have higher non-response rates, this may lead to underestimation of  
19 educational differences in mental health. Nevertheless, the strong association between economic  
20 difficulties and psychological distress suggests that the results may not be severely underestimated.  
21  
22 In addition, the study is based on cross-sectional data which prevents any causal interpretations of  
23 the results. Similar results on the lack of association between low educational level and  
24 psychological distress have, however, been reported from a longitudinal study in Sweden (13). An  
25 association between income and psychological distress was found in the longitudinal study, but the  
26 association was much weaker than the association between economic difficulties and psychological  
27 distress found in the present study.  
28  
29  
30  
31  
32  
33  
34  
35  
36  
37  
38  
39  
40

41 One of the advantages of the present study is that it is based on a considerable, representative  
42 sample of the general population in a large geographic area and covers a wide age group of men and  
43 women from 25 to 74 years. Although the study was limited to four counties, it covers the general  
44 adult population in these counties, comprising almost 1 million inhabitants. The prevalence of  
45 psychological distress was also similar to the national average in Sweden (16). Another strength is the  
46 use of GHQ-12 as a measure of psychological distress as it has been internationally validated (11).  
47  
48 GHQ-12 has been used in several other studies to measure social inequalities in mental health  
49 problems (2, 12-13). Similar results as for GHQ-12 have also been reported for other measures of  
50  
51  
52  
53  
54  
55  
56  
57  
58  
59  
60

1  
2  
3 common mental disorders such as the mental component summary of the Short Form-36 Health  
4 Survey (SF-36) (2) and the fifth question of the European Quality of Life – 5 Dimensions scale (EQ-5D)  
5  
6  
7 (8). Educational level, age and gender were based on register data which increases the reliability of  
8  
9 these variables.

10  
11  
12  
13 Mental health problems may have a mediating role in the association between education and self-  
14 rated health. In this study, no inverse association between educational level and psychological  
15 distress was however found. On the basis of the results of this and other studies (8, 13), it is  
16  
17 therefore improbable that mental health problems would explain, or even have a significant  
18  
19 contribution to, educational inequalities in self-rated health, and even more general to health  
20  
21 inequalities in Sweden. This applies to men and women alike. The notion that it is improbable that  
22  
23 mental health problems would explain educational inequalities in self-rated health is further  
24  
25 supported by the fact that psychosocial factors have a weaker contribution to educational  
26  
27 inequalities in self-rated health than material factors (17).

28  
29  
30  
31  
32  
33  
34 In summary, no inverse association between educational level and psychological distress was found  
35  
36 in this study. Persons with medium educational had even a somewhat lower level of psychological  
37  
38 distress than persons with high education. The associations between educational level, economic  
39  
40 difficulties and psychological distress did not differ between men and in women.  
41  
42  
43  
44  
45  
46  
47  
48

#### 49 **References:**

- 50  
51 1. Fryers T, Melzer D, Jenkins R. Social inequalities and the common mental disorders: a  
52  
53 systematic review of the evidence. *Soc Psychiatry Psychiatr Epidemiol* 2003;38:229-37.  
54  
55  
56  
57  
58  
59  
60

- 1  
2  
3 2. Lahelma E, Laaksonen M, Martikainen P, Rahkonen O, Sarlio-Lähteenkorva S. Multiple  
4 measures of socioeconomic circumstances and common mental disorders. *Soc Sci Med*  
5 2006;63:1383–99.  
6  
7
- 8  
9 3. Duchaine CS, Ndjaboué R, Levesque M, Vézina M, Trudel X, Gilbert-Ouimet M, Dionne CE,  
10 Mâsse B, Pearce N, Brisson C. Psychosocial work factors and social inequalities in  
11 psychological distress: a population-based study. *BMC Public Health* 2017;17:91.  
12  
13
- 14  
15 4. Eikemo TA, Bambra C, Joyce K, Dahl E. Welfare state regimes and income-related health  
16 inequalities: a comparison of 23 European countries. *Eur J Public Health* 2008;18:593–9.  
17  
18
- 19  
20 5. Hu Y, van Lenthe FJ, Borsboom GJ, Looman CW, Bopp M, Burström B, Dzúrová D, Ekholm O,  
21 Klumbiene J, Lahelma E, Leinsalu M, Regidor E, Santana P, de Gelder R, Mackenbach JP.  
22 Trends in socioeconomic inequalities in self-assessed health in 17 European countries  
23 between 1990 and 2010. *J Epidemiol Community Health* 2016;70:644-52.  
24  
25
- 26  
27 6. Mackenbach JP, Kulhánová I, Artnik B, Bopp M, Borrell C, Clemens T, Costa G, Dibben C,  
28 Kalediene R, Lundberg O, Martikainen P, Menvielle G, Östergren O, Prochorskas R, Rodríguez-  
29 Sanz M, Strand BH, Looman CW, de Gelder R. Changes in mortality inequalities over two  
30 decades: register based study of European countries. *BMJ* 2016;353:i1732.  
31  
32
- 33  
34 7. Lorant V, Deliege D, Eaton W, Robert A, Philippot P, Ansseau M. Socioeconomic inequalities  
35 in depression: a meta-analysis. *Am J Epidemiol* 2003;157:98-112.  
36  
37
- 38  
39 8. Molarius A, Berglund K, Eriksson C, Eriksson HG, Lindén-Boström M, Nordström E, Persson C,  
40 Sahlqvist L, Starrin B, Ydreborg B. Mental health symptoms in relation to socio-economic  
41 conditions and lifestyle factors - a population-based study in Sweden. *BMC Public Health*  
42 2009;9:302.  
43  
44
- 45  
46 9. Whiteford HA, Degenhardt L, Rehm J, Baxter AJ, Ferrari AJ, Erskine HE, Charlson FJ, Norman  
47 RE, Flaxman AD, Johns N, Burstein R, Murray CJ, Vos T. Global burden of disease attributable  
48 to mental and substance use disorders: findings from the Global Burden of Disease Study  
49 2010. *Lancet* 2013;382:1575-86.  
50  
51  
52  
53  
54  
55  
56  
57

- 1  
2  
3 10. Granström F, Molarius A, Garvin P, Feldman I, Elo S, Kristenson M. Exploring trends in and  
4  
5 determinants of educational inequalities in self-rated health. *Scand J Public Health*  
6  
7 2015;43:677-86.
- 8  
9 11. Goldberg DP, Gater R, Sartorius N, Ustun TB, Piccinelli M, Gureje O, Rutter C. The validity of  
10  
11 two versions of the GHQ in the WHO study of mental illness in general health care. *Psychol*  
12  
13 *Med* 1997;27:191-7.
- 14  
15 12. Ahnquist J, Wamala SP. Economic hardships in adulthood and mental health in Sweden. The  
16  
17 Swedish National Public Health Survey 2009. *BMC Public Health* 2011;11:788.
- 18  
19 13. Kosidou K, Dalman C, Lundberg M, Hallqvist J, Isacson G, Magnusson C. Socioeconomic  
20  
21 status and risk of psychological distress and depression in the Stockholm Public Health  
22  
23 Cohort: a population-based study. *J Affect Disord* 2011;134:160-7.
- 24  
25 14. Andersen I, Thielen K, Nygaard E, Diderichsen F. Social inequality in the prevalence of  
26  
27 depressive disorders. *J Epidemiol Community Health* 2009;63:575-81.
- 28  
29 15. Freeman A, Tyrovolas S, Koyanagi A, Chatterji S, Leonardi M, Ayuso-Mateos JL, Tobiasz-  
30  
31 Adamczyk B, Koskinen S, Rummel-Kluge C, Haro JM. The role of socio-economic status in  
32  
33 depression: results from the COURAGE (aging survey in Europe). *BMC Public Health*  
34  
35 2016;16:1098.
- 36  
37 16. The Public Health Agency of Sweden. Hälsa på lika villkor? Nationella folkhälsoenkäten.  
38  
39 [Health on equal terms? The national public health survey.] [www.folkhalsomyndigheten.se](http://www.folkhalsomyndigheten.se).  
40  
41 (accessed 10 Nov 2017).
- 42  
43 17. Moor I, Spallek J, Richter M. Explaining socioeconomic inequalities in self-rated health: a  
44  
45 systematic review of the relative contribution of material, psychosocial and behavioural  
46  
47 factors. *J Epidemiol Community Health* 2017;71:565-575.
- 48  
49  
50  
51  
52  
53  
54  
55  
56  
57  
58  
59  
60

## Footnotes

**Contributors:** AM conceived the study and analysed the data. AM and FG interpreted the results and drafted and critically revised the manuscript. Both authors read and approved the final manuscript.

**Funding:** The survey was funded by the County Councils of Västmanland (now Region Västmanland), Sörmland, Uppsala and Örebro.

**Competing interests:** None declared.

**Ethics approval:** The survey was approved by the regional ethical review board in Uppsala (EPN 2012/256).

**Competing interests:** None declared.

**Provenance and peer review:** Not commissioned; externally peer reviewed.

**Data sharing statement:** No additional data available.



# BMJ Open

## Educational differences in psychological distress? Results from a population-based sample of men and women in Sweden in 2012

|                                 |                                                                                                                                                                                                                       |
|---------------------------------|-----------------------------------------------------------------------------------------------------------------------------------------------------------------------------------------------------------------------|
| Journal:                        | <i>BMJ Open</i>                                                                                                                                                                                                       |
| Manuscript ID                   | bmjopen-2017-021007.R1                                                                                                                                                                                                |
| Article Type:                   | Research                                                                                                                                                                                                              |
| Date Submitted by the Author:   | 02-Mar-2018                                                                                                                                                                                                           |
| Complete List of Authors:       | Molarius, Anu; Region Vastmanland, Competence Centre for Health; Karlstads Universitet, Department of Public Health Sciences<br>Granström, Fredrik; Linkopings universitet, Department of Medical and Health Sciences |
| <b>Primary Subject Heading</b>: | Public health                                                                                                                                                                                                         |
| Secondary Subject Heading:      | Mental health, Epidemiology, Sociology                                                                                                                                                                                |
| Keywords:                       | MENTAL HEALTH, PUBLIC HEALTH, EPIDEMIOLOGY, SOCIAL MEDICINE                                                                                                                                                           |
|                                 |                                                                                                                                                                                                                       |

SCHOLARONE™  
Manuscripts

1  
2  
3  
4  
5  
6  
7  
8  
9  
10  
11 **Educational differences in psychological distress? Results from a population-**  
12 **based sample of men and women in Sweden in 2012**  
13  
14  
15

16  
17  
18 Anu Molarius<sup>1,2</sup>, Fredrik Granström<sup>3</sup>  
19  
20

21  
22 <sup>1</sup>Competence Centre for Health, Region Västmanland, Västerås, Sweden  
23

24 <sup>2</sup>Department of Public Health Sciences, Karlstad University, Karlstad, Sweden  
25

26 <sup>3</sup>Division of Community Medicine, Department of Medical and Health Sciences, Linköping University,  
27  
28 Linköping, Sweden  
29  
30

31  
32  
33  
34  
35  
36  
37  
38  
39  
40 Correspondence: Anu Molarius, Competence Centre for Health, Region Västmanland, 721 89  
41

42 Västerås, Sweden, tel: +46 21 174583, e-mail: anu.molarius@regionvastmanland.se  
43  
44  
45  
46  
47  
48  
49  
50

51 Word count: 2422  
52

53 Keywords: Health inequalities, Psychological distress, Population surveys, Sweden  
54  
55  
56  
57  
58  
59  
60

## Abstract

*Background:* Mental health problems are more frequent in socially disadvantaged groups, but the results vary between different studies, different populations and different measures of mental health. This paper investigated the association between educational level, economic difficulties and psychological distress in men and women in Sweden.

*Methods:* The study population included 24,510 respondents aged 25-74 years who responded a survey questionnaire in Mid-Sweden in 2012 (response rate 53%). Psychological distress was measured with GHQ-12 and multivariate logistic regression models were used in statistical analyses, adjusting for age, employment status and social support.

*Results:* The prevalence of psychological distress was higher in women (16.4%) than in men (11.3%;  $p < 0.001$ ). Persons with low and medium educational level had a lower risk of psychological distress than persons with high educational level after adjustment for confounders. Economic difficulties had a strong association with psychological distress (OR=2.80 (95% CI: 2.39, 3.27) and OR=2.40 (95% CI: 2.12, 3.71) in men and women, respectively), after adjustment for confounders.

*Conclusion:* We found a strong association between economic difficulties and psychological distress in this study, but no inverse association between educational level and psychological distress. On the contrary, persons with high education had more psychological distress than persons with low and medium education when age, employment status and social support were taken into account. The findings were similar in men and women.

**Strengths and limitations of this study**

- The study is based on a considerable, representative sample of the general population in a large geographic area and covers a wide age group of men and women from 25 to 74 years.
- Internationally validated questionnaire (GHQ-12) was used to measure psychological distress and register data to measure educational level.
- As people with poor health and/or low education often have lower response rates, the response-rate of 53% may have led to under- or overestimation of the differences in mental health.
- The study is based on cross-sectional data which does not allow interpretations of the direction of the observed associations.

## Introduction

Social inequalities in health are well documented and have been found for several health outcomes such as mental health problems (1-3), self-rated health (4-5) and mortality (6). The most often used measures of socio-economic status include education, income and occupation. Mental health problems are the leading cause of disability worldwide (7) and have large economic and social consequences both for the individual and society. For mental health problems, there is strong evidence that low socioeconomic position is associated with severe mental health disorders such as major depression (8-9). Previous studies have also shown that less severe mental health problems are significantly more frequent in socially disadvantaged groups, such as the unemployed and persons with low education, low income and poor material standard of living (1).

Even though low education is consistently associated with mental health problems (1) some previous studies have shown stronger associations with income or financial difficulties or strain than with educational level (2, 10-12). Some studies have even found that the association is stronger for financial difficulties than for income (2, 11). It has been suggested that the egalitarian socioeconomic policies in the Nordic countries may reduce the effect of income on health (11). However, also a longitudinal study in Britain found that financial strain in form of self-reported economic difficulties is a better independent predictor for future psychiatric morbidity than poverty and unemployment (13). In addition, differences in the association between educational level and mental health problems in the form of psychological distress between men and women have been reported (3). The associations may therefore differ between populations, genders and national or cultural contexts, and may also change over time.

1  
2  
3 Socioeconomic differences in minor mental health problems are usually examined using validated  
4 and reliable measures such as the General Health Questionnaire (GHQ), SF-36 Mental Health  
5 Component Summary or the 5th Question of the European Quality of Life Instrument (EQ-5D). GHQ  
6  
7 measures psychological distress, which includes depressive symptoms, anxiety and affective well-  
8  
9 being (14). It is a widely used measure of minor psychiatric morbidity, which primarily reflects  
10  
11 general, non-psychotic and context-free mental health problems in the recent past but is also  
12  
13 predictive of more severe mental disorders (14).  
14  
15  
16  
17  
18

19 A longitudinal study in Sweden investigated the associations between socioeconomic status and the  
20  
21 risk of psychological distress and depression (12). The results showed that education was unrelated  
22  
23 to either outcome among men and women whereas income was associated with the risk of both  
24  
25 outcomes and that the strength of the associations increased with symptom severity. The role of  
26  
27 financial difficulties was not assessed in that study. A cross-sectional study based on the national  
28  
29 public health survey in Sweden assessed the association between economic hardship and mental  
30  
31 health problems, but the independent effect of educational level was not studied (11).  
32  
33  
34  
35

36 The aim of this study was therefore to investigate the association between educational level,  
37  
38 economic difficulties and mental health problems in the form of psychological distress in a  
39  
40 population-based sample in Sweden in 2012. Also, possible differences in these associations between  
41  
42 men and women were assessed.  
43  
44  
45  
46  
47  
48

## 49 **Methods**

50  
51 The study is based on a survey questionnaire sent to a random population sample in four counties in  
52  
53 Mid-Sweden in 2012. The survey was carried out in collaboration with the Public Health Institute  
54  
55 (now the Public Health Agency of Sweden) and the four counties (Uppsala, Sörmland, Västmanland  
56  
57

1  
2  
3 and Örebro). The age range was 25-74 years and the study population included 24,510 respondents  
4  
5 (response rate 53%).  
6  
7

8  
9 Information on gender, age and educational level were based on register data from Statistics  
10  
11 Sweden. Levels of education were categorised into compulsory school or equivalent education for  
12  
13 nine years or less, secondary education (10–12 years of education), and post-secondary education  
14  
15 (more than 12 years of education). Current economic difficulties were assessed by asking whether  
16  
17 the respondent had had problems with current expenditure for food, rent, bills, etc. during the past  
18  
19 12 months (yes/no).  
20  
21

22  
23  
24 *Psychological distress* was measured by the 12-item version of the General Health Questionnaire  
25  
26 (GHQ-12) (14). A recommended and commonly used cut off point of three or more symptoms was  
27  
28 used in this study to indicate psychological distress (2, 11, 14).  
29  
30

31  
32 Since employment status and social support are associated with mental health problems (10) we  
33  
34 considered them as potential confounders. Employment status was derived from a survey question  
35  
36 about whether the respondent was employed, self-employed, student, unemployed, on sickness  
37  
38 leave (more than 3 months), on disability pension or retired. Social support was assessed by the  
39  
40 question: “Do you have anyone you can share your innermost feelings with and confide in?” (yes/no).  
41  
42  
43

44  
45 The respondents gave their informed consent for applying the registry data by answering the  
46  
47 questionnaire. After the record linkage, all identity information were removed before the material  
48  
49 was handed over from Statistics Sweden to the county councils. Permission from the regional ethical  
50  
51 review board in Uppsala has been obtained (EPN 2012/256).  
52  
53

54  
55 *Patient and public involvement*  
56  
57

1  
2  
3 The study did not involve patients. The results of the survey are disseminated to the public through  
4  
5 websites of the four County Councils.  
6  
7

### 8 9 *Statistical methods*

10  
11 Prevalence of psychological distress is reported by educational level and economic difficulties in men  
12  
13 and women. Multivariate logistic regression models were used to examine the association between  
14  
15 educational level, economic difficulties and psychological distress. Separate models were run for men  
16  
17 and women. Since the prevalence of mental health problems is higher in younger age groups (8) all  
18  
19 the models were adjusted for age (in 10-year groups). The first model only included age and  
20  
21 educational level as independent variables. In the second model economic difficulties were added. In  
22  
23 the final model, the potential confounders employment status and social support were also included.  
24  
25 The results are reported as odds ratios (OR) and 95 percent confidence intervals (95% CI) for  
26  
27 psychological distress. SPSS, version 24, was used for all analyses.  
28  
29  
30  
31  
32  
33

### 34 **Results**

35  
36 About half of the study population had medium educational level (table 1). About one in ten had only  
37  
38 compulsory education and 32% of the men and 40% of the women had post-secondary education.  
39  
40 12% of the men and 15% of the women reported economic difficulties during the last 12 months.  
41  
42  
43  
44  
45  
46  
47  
48  
49  
50  
51  
52  
53  
54  
55  
56  
57  
58  
59  
60



Table 1. Characteristics of the study population, men and women aged 25-74 years in 2012.

| <b>Variable</b>                  | <b>Men</b>  | <b>Women</b> |
|----------------------------------|-------------|--------------|
| <b>N</b>                         | 11133       | 13377        |
| <b>Age (mean, SD)</b>            | 55.4 (13.5) | 53.4 (13.8)  |
| <b>Educational level (%)</b>     |             |              |
| <b>Low</b>                       | 20.5        | 15.3         |
| <b>Medium</b>                    | 47.6        | 44.8         |
| <b>High</b>                      | 31.9        | 39.9         |
| <b>Economic difficulties (%)</b> |             |              |
| <b>No</b>                        | 88.4        | 85.4         |
| <b>Yes</b>                       | 11.6        | 14.6         |
| <b>Employment status (%)</b>     |             |              |
| <b>Employed</b>                  | 52.0        | 56.8         |
| <b>Self-employed</b>             | 10.6        | 4.1          |
| <b>Student</b>                   | 1.4         | 2.9          |
| <b>Unemployed</b>                | 2.9         | 3.5          |
| <b>On sickness leave</b>         | 1.9         | 3.4          |
| <b>On disability pension</b>     | 2.8         | 4.4          |
| <b>Retired</b>                   | 28.3        | 24.9         |
| <b>Social support (%)</b>        |             |              |
| <b>Yes</b>                       | 87.7        | 90.9         |
| <b>No</b>                        | 12.3        | 9.1          |

1  
2  
3 The prevalence of psychological distress was higher in women (16.4%) than in men (11.3%;  $p < 0.001$ ).

4  
5 There were rather small differences between educational levels, with somewhat higher levels of  
6  
7 psychological distress at high educational level (table 2). There was, however, a strong association  
8  
9 between economic difficulties and psychological distress in both men and women.  
10

11  
12  
13 In the age adjusted model, the odds ratio for psychological distress for the low educational level was  
14  
15 not statistically significant when compared to the high educational level (table 2). Persons with  
16  
17 medium educational level had a lower risk of psychological distress than persons with high  
18  
19 educational level. Further adjustment for economic difficulties showed that economic difficulties had  
20  
21 a strong association with psychological distress, but the association between educational level and  
22  
23 psychological distress remained practically unchanged. Further adjustment for employment status  
24  
25 and social support attenuated somewhat the odds ratio for economic difficulties but the association  
26  
27 remained strong and statistically significant. The odds ratio for psychological distress at low  
28  
29 educational level became statistically significantly below one. No statistically significant differences  
30  
31 were observed in the odds ratios for educational level and economic difficulties between men and  
32  
33 women.  
34  
35  
36  
37  
38  
39  
40  
41  
42  
43  
44  
45  
46  
47  
48  
49  
50  
51  
52  
53  
54  
55  
56  
57  
58  
59  
60

Table 2. Prevalence and odds ratios (OR) from multivariate logistic regression models for psychological distress by educational level and current economic difficulties in men and women aged 25-74 years in 2012.

| Variable              | N     | Psychological distress (%) | Model 1<br>OR (95 % CI) | Model 2<br>OR (95 % CI) | Model 3<br>OR (95 % CI) |
|-----------------------|-------|----------------------------|-------------------------|-------------------------|-------------------------|
| <b>Total</b>          | 24510 | 14.1                       |                         |                         |                         |
| <b>Men</b>            | 11133 | 11.3                       |                         |                         |                         |
| Educational level     |       |                            |                         |                         |                         |
| Low                   | 2279  | 10.3                       | 1.02 (0.86, 1.22)       | 0.90 (0.75, 1.08)       | 0.78 (0.65, 0.95)       |
| Medium                | 5302  | 10.8                       | 0.86 (0.76, 0.99)       | 0.80 (0.70, 0.92)       | 0.75 (0.65, 0.87)       |
| High                  | 3552  | 12.8                       | 1                       | 1                       | 1                       |
| Economic difficulties |       |                            |                         |                         |                         |
| No                    | 9827  | 9.1                        |                         | 1                       | 1                       |
| Yes                   | 1283  | 29.0                       |                         | 3.79 (3.28, 4.37)       | 2.80 (2.39, 3.27)       |
| <b>Women</b>          | 13377 | 16.4                       |                         |                         |                         |
| Educational level     |       |                            |                         |                         |                         |
| Low                   | 2043  | 14.4                       | 1.06 (0.91, 1.23)       | 0.93 (0.80, 1.08)       | 0.72 (0.61, 0.85)       |
| Medium                | 5988  | 15.4                       | 0.90 (0.82, 1.00)       | 0.83 (0.75, 0.92)       | 0.73 (0.66, 0.82)       |
| High                  | 5346  | 18.2                       | 1                       | 1                       | 1                       |
| Economic difficulties |       |                            |                         |                         |                         |
| No                    | 11394 | 13.3                       |                         | 1                       | 1                       |

1  
2  
3  
4  
5  
6  
7  
8  
9  
10  
11  
12  
13  
14  
15  
16  
17  
18  
19  
20  
21  
22  
23  
24  
25  
26  
27  
28  
29  
30  
31  
32  
33  
34  
35  
36  
37  
38  
39  
40  
41  
42  
43  
44  
45  
46  
47

---

|     |      |      |                   |                   |
|-----|------|------|-------------------|-------------------|
| Yes | 1946 | 34.8 | 3.07 (2.75, 3.43) | 2.40 (2.12, 2.71) |
|-----|------|------|-------------------|-------------------|

---

Model 1: Adjusted for age.

Model 2: Adjusted for age and economic difficulties.

Model 3: Adjusted for age, economic difficulties, employment status and social support.

For peer review only

## Discussion

The findings of this study suggest that there is no inverse association between educational level and psychological distress in this adult population in Sweden. A strong association between economic difficulties and psychological distress was however found. The associations between educational level, economic difficulties and psychological distress, respectively, were rather similar in men and in women even though the prevalence of psychological distress was higher among women.

Several previous studies have shown educational differences in mental health problems (1) but a weak association between educational level and common mental disorders has been observed for example in a working population in Finland (2). No association between low education and mental health problems has been reported from some studies in Sweden (10,12) whereas a Danish study showed a relationship between low education and high prevalence of both minor and major depression (15). A strong association between low education and clinical depression has also been reported among representative population-based studies conducted in Finland, Poland and Spain (16). These findings suggest that low education may be more consistently related to severe mental health problems than to minor psychiatric morbidity.

The results concerning economic difficulties are in line with a national Swedish study where economic hardship was strongly associated with psychological distress (11). Several other studies have also shown stronger associations with income or financial difficulties or strain than with educational level (2, 10, 12). Of the measures of socio-economic positions, educational level is usually the most distant and acquired first. It affects occupation and employment status which in turn contribute to income. Income contributes to material standards of living and purchasing power. Yet, economic difficulties reflect more proximate and accumulated influences or may be more

1  
2  
3 related to adverse changes in living conditions which may contribute to their stronger association  
4  
5 with mental health problems (1-2, 11, 13).  
6  
7

8  
9 The association between educational level and psychological distress was similar in men and women  
10  
11 in our study. This is in line with several previous studies (2, 12) and does not confirm the gender  
12  
13 differences found, for example, in Canada (3). Also the association between economic difficulties and  
14  
15 psychological distress was similar in both genders reconfirming the findings from some previous  
16  
17 studies (2, 11).  
18  
19

20  
21 The current study has some limitations. The response rate was 53%. As people with poor health  
22  
23 and/or low education often have lower response rates, this may lead to underestimation of  
24  
25 educational differences in mental health. Also, an overestimation of the association is possible (17).  
26  
27 Nevertheless, the strong association between economic difficulties and psychological distress  
28  
29 suggests that the results should not be severely underestimated. In addition, the study is based on  
30  
31 cross-sectional data which prevents any interpretations of the direction of the results. It is possible  
32  
33 that mental health problems lead to reduced educational attainment, reduced income and higher  
34  
35 level of economic difficulties. Previous longitudinal studies have, however, shown that the main  
36  
37 direction is from income and economic difficulties to mental health problems (9, 12-13).  
38  
39  
40

41  
42 In our analysis we adjusted for employment status and social support in the final model. The  
43  
44 association between economic difficulties and psychological distress was somewhat attenuated after  
45  
46 this adjustment, especially among men, indicating that a part of the association may be explained by  
47  
48 increased economic difficulties due to unemployment, long-term sickness leave or disability pension,  
49  
50 but the association still remained strong after the adjustment both in men and women. On the other  
51  
52 hand, after full adjustment, the odds ratio for low educational level became statistically significantly  
53  
54 below one indicating that persons with low education have less psychological distress than persons  
55  
56  
57

1  
2  
3 with high education when employment status and social support are taken into account. Data on  
4  
5 some other potential confounders such as personal history of mental health problems was not  
6  
7 available and therefore some residual confounding is possible. Furthermore, a common method bias  
8  
9 may have affected the association between economic difficulties and psychological distress since  
10  
11 both the exposure and outcome were self-reported. This, however, is more likely to lead to an  
12  
13 underestimation than to an overestimation of the association (18).  
14  
15

16  
17 We used one measure of mental health problems, psychological distress (GHQ-12), in this study.  
18  
19 Some previous studies have combined several measures. Lahelma et al. (2) used both GHQ-12 and  
20  
21 SF-36 Mental Component Summary to examine the association between socioeconomic position and  
22  
23 common mental disorders in their study among Finnish employees and found similar results for both  
24  
25 measures as well as two different cut-off points for GHQ-12 indicating severity. Ahnquist and  
26  
27 Wamala (11) used three different indicators of mental health problems in their study of the Swedish  
28  
29 population: psychological distress (GHQ-12), severe anxiety and use of antidepressant medication.  
30  
31 Even they found that the association between economic hardship and mental health problems was  
32  
33 unrelated to the indicator used.  
34  
35

36  
37  
38 One of the advantages of the present study is that it is based on a considerable, representative  
39  
40 sample of the general population in a large geographic area and covers a wide age group of men and  
41  
42 women from 25 to 74 years. Although the study was limited to four counties, it covers the general  
43  
44 adult population in these counties, comprising almost 1 million inhabitants. The prevalence of  
45  
46 psychological distress was similar to the national average in Sweden (19). Another strength is the use  
47  
48 of GHQ-12 as a measure of psychological distress as it has been internationally validated (14). GHQ-  
49  
50 12 has been used in several other studies to measure social inequalities in mental health problems  
51  
52 (2, 11-12). Similar results as for GHQ-12 have also been reported for other measures of mental health  
53  
54 problems such as the mental component summary of the Short Form-36 Health Survey (SF-36) (2)  
55  
56  
57  
58  
59  
60

1  
2  
3 and the fifth question of the European Quality of Life – 5 Dimensions scale (EQ-5D) (10). Educational  
4 level, age and gender were based on register data which increases the reliability of these variables.  
5  
6

7  
8  
9 Mental health problems are the leading cause of disability worldwide (7) and social inequalities in  
10 health are a major public health challenge. In Sweden, there are large educational differences in self-  
11 rated health. Persons with low educational level have approximately twice as often poor self-rated  
12 health as persons with high educational level (5, 20). As mental health problems are strongly  
13 associated with self-rated health (21), mental health problems may have a mediating role in the  
14 association between education and self-rated health. In this study, no inverse association between  
15 educational level and psychological distress was however found. It is therefore improbable that  
16 mental health problems would explain educational inequalities in self-rated health. The notion is  
17 further supported by the fact that psychosocial factors have a weaker contribution to educational  
18 inequalities in self-rated health than material factors (22). In this study persons with high education  
19 had more psychological distress than persons with low and medium education after adjustment for  
20 confounders. Further studies are required in order to explain the positive association between  
21 educational level and psychological distress.  
22  
23  
24  
25  
26  
27  
28  
29  
30  
31  
32  
33  
34  
35  
36  
37

38 In summary, no inverse association between educational level and psychological distress was found  
39 in this study. Persons with medium educational had a somewhat lower level of psychological distress  
40 than persons with high education. After adjustment for employment status and social support even  
41 persons with low educational level had less psychological distress than those with high education.  
42  
43 However, a strong association between economic difficulties and psychological distress was found.  
44  
45 The associations between educational level, economic difficulties and psychological distress did not  
46 differ between men and in women.  
47  
48  
49  
50  
51  
52  
53  
54  
55  
56  
57  
58  
59  
60



**References:**

1. Fryers T, Melzer D, Jenkins R. Social inequalities and the common mental disorders: a systematic review of the evidence. *Soc Psychiatry Psychiatr Epidemiol* 2003;38:229-37.
2. Lahelma E, Laaksonen M, Martikainen P, Rahkonen O, Sarlio-Lähteenkorva S. Multiple measures of socioeconomic circumstances and common mental disorders. *Soc Sci Med* 2006;63:1383-99.
3. Duchaine CS, Ndjaboué R, Levesque M, Vézina M, Trudel X, Gilbert-Ouimet M, Dionne CE, Mâsse B, Pearce N, Brisson C. Psychosocial work factors and social inequalities in psychological distress: a population-based study. *BMC Public Health* 2017;17:91.
4. Eikemo TA, Bamba C, Joyce K, Dahl E. Welfare state regimes and income-related health inequalities: a comparison of 23 European countries. *Eur J Public Health* 2008;18:593-9.
5. Hu Y, van Lenthe FJ, Borsboom GJ, Looman CW, Bopp M, Burström B, Dzúrová D, Ekholm O, Klumbiene J, Lahelma E, Leinsalu M, Regidor E, Santana P, de Gelder R, Mackenbach JP. Trends in socioeconomic inequalities in self-assessed health in 17 European countries between 1990 and 2010. *J Epidemiol Community Health* 2016;70:644-52.
6. Mackenbach JP, Kulhánová I, Artnik B, Bopp M, Borrell C, Clemens T, Costa G, Dibben C, Kalediene R, Lundberg O, Martikainen P, Menvielle G, Östergren O, Prochorskas R, Rodríguez-Sanz M, Strand BH, Looman CW, de Gelder R. Changes in mortality inequalities over two decades: register based study of European countries. *BMJ* 2016;353:i1732.
7. Whiteford HA, Degenhardt L, Rehm J, Baxter AJ, Ferrari AJ, Erskine HE, Charlson FJ, Norman RE, Flaxman AD, Johns N, Burstein R, Murray CJ, Vos T. Global burden of disease attributable to mental and substance use disorders: findings from the Global Burden of Disease Study 2010. *Lancet* 2013;382:1575-86.
8. Lorant V, Deliege D, Eaton W, Robert A, Philippot P, Ansseau M. Socioeconomic inequalities in depression: a meta-analysis. *Am J Epidemiol* 2003;157:98-112.

- 1  
2  
3 9. Wang JL, Schmitz N, Dewa CS. Socioeconomic status and the risk of major depression: the  
4  
5 Canadian National Population Health Survey. *J Epidemiol Community Health* 2010;64:447-52.  
6
- 7 10. Molarius A, Berglund K, Eriksson C, Eriksson HG, Lindén-Boström M, Nordström E, Persson C,  
8  
9 Sahlqvist L, Starrin B, Ydreborg B. Mental health symptoms in relation to socio-economic  
10  
11 conditions and lifestyle factors - a population-based study in Sweden. *BMC Public Health*  
12  
13 2009;9:302.  
14
- 15 11. Ahnquist J, Wamala SP. Economic hardships in adulthood and mental health in Sweden. The  
16  
17 Swedish National Public Health Survey 2009. *BMC Public Health* 2011;11:788.  
18
- 19 12. Kosidou K, Dalman C, Lundberg M, Hallqvist J, Isacsson G, Magnusson C. Socioeconomic  
20  
21 status and risk of psychological distress and depression in the Stockholm Public Health  
22  
23 Cohort: a population-based study. *J Affect Disord* 2011;134:160-7.  
24
- 25 13. Weich S, Lewis G. Poverty, unemployment, and common mental disorders: population based  
26  
27 cohort study. *BMJ* 1998;317:115-9.  
28
- 29 14. Goldberg DP, Gater R, Sartorius N, Ustun TB, Piccinelli M, Gureje O, Rutter C. The validity of  
30  
31 two versions of the GHQ in the WHO study of mental illness in general health care. *Psychol*  
32  
33 *Med* 1997;27:191-7.  
34
- 35 15. Andersen I, Thielen K, Nygaard E, Diderichsen F. Social inequality in the prevalence of  
36  
37 depressive disorders. *J Epidemiol Community Health* 2009;63:575-81.  
38
- 39 16. Freeman A, Tyrovolas S, Koyanagi A, Chatterji S, Leonardi M, Ayuso-Mateos JL, Tobiasz-  
40  
41 Adamczyk B, Koskinen S, Rummel-Kluge C, Haro JM. The role of socio-economic status in  
42  
43 depression: results from the COURAGE (aging survey in Europe). *BMC Public Health*  
44  
45 2016;16:1098.  
46
- 47 17. Hernan MA, Hernandez-Diaz S, Robins JM. A structural approach to selection bias.  
48  
49 *Epidemiology* 2004;15:615-625.  
50
- 51 18. Rothman K, Greenland S, Last TL. Modern epidemiology. 3rd ed. Philadelphia: Lippincott  
52  
53 Williams and Wilkins; 2008.  
54  
55  
56  
57

- 1  
2  
3 19. The Public Health Agency of Sweden. Hälsa på lika villkor? Nationella folkhälsoenkäten.  
4  
5 [Health on equal terms? The national public health survey.] [www.folkhalsomyndigheten.se](http://www.folkhalsomyndigheten.se).  
6  
7 (accessed 22 Feb 2018).  
8  
9 20. Granström F, Molarius A, Garvin P, Feldman I, Elo S, Kristenson M. Exploring trends in and  
10  
11 determinants of educational inequalities in self-rated health. *Scand J Public Health*  
12  
13 2015;43:677-86.  
14  
15 21. Molarius A, Janson S. Self-rated health, chronic diseases, and symptoms among middle-aged  
16  
17 and elderly men and women. *J Clin Epidemiol* 2002;55:364-370.  
18  
19 22. Moor I, Spallek J, Richter M. Explaining socioeconomic inequalities in self-rated health: a  
20  
21 systematic review of the relative contribution of material, psychosocial and behavioural  
22  
23 factors. *J Epidemiol Community Health* 2017;71:565-575.  
24  
25  
26  
27  
28  
29

### Footnotes

30  
31  
32  
33  
34 **Contributors:** AM conceived the study and analysed the data. AM and FG interpreted the results and  
35  
36 drafted and critically revised the manuscript. Both authors read and approved the final manuscript.  
37

38 **Funding:** The survey was funded by the County Councils of Västmanland (now Region Västmanland),  
39  
40 Sörmland, Uppsala and Örebro.  
41

42 **Competing interests:** None declared.  
43

44 **Ethics approval:** The survey was approved by the regional ethical review board in Uppsala (EPN  
45  
46 2012/256).  
47

48 **Competing interests:** None declared.  
49

50 **Provenance and peer review:** Not commissioned; externally peer reviewed.  
51  
52

53 **Data sharing statement:** No additional data available.  
54  
55  
56  
57  
58  
59  
60
